# Disruption of *Tsc2* in oocytes leads to overactivation of the entire pool of primordial follicles

Deepak Adhikari<sup>1,6,†</sup>, Gilian Flohr<sup>2,†</sup>, Nagaraju Gorre<sup>1</sup>, Yan Shen<sup>1</sup>, Hairu Yang<sup>1</sup>, Eva Lundin<sup>3</sup>, Zijian Lan<sup>4</sup>, Michael J. Gambello<sup>5</sup>, and Kui Liu<sup>1</sup>

<sup>1</sup>Department of Medical Biochemistry and Biophysics, Umeå University SE-901 87, Umeå, Sweden <sup>2</sup>Hogeschool Leiden, Zernikedreef 11, 2333 CK Leiden, The Netherlands <sup>3</sup>Medical Biosciences/Pathology, Umeå University SE-901 87, Umeå, Sweden <sup>4</sup>University of Louisville Health Sciences Center, Louisville, KY, USA <sup>5</sup>University of Texas Health Science Center at Houston, Department of Pediatrics, Houston, Texas, USA

<sup>6</sup>Correspondence address. E-mail: deepak.adhikari@medchem.umu.se

**ABSTRACT:** To maintain the length of reproductive life in a woman, it is essential that most of her ovarian primordial follicles are maintained in a quiescent state to provide a continuous supply of oocytes. However, our understanding of the molecular mechanisms that control the quiescence and activation of primordial follicles is still in its infancy. In this study, we provide some genetic evidence to show that the tumor suppressor tuberous sclerosis complex 2 (*Tsc2*), which negatively regulates mammalian target of rapamycin complex 1 (mTORC1), functions in oocytes to maintain the dormancy of primordial follicles. In mutant mice lacking the *Tsc2* gene in oocytes, the pool of primordial follicles is activated prematurely due to elevated mTORC1 activity in oocytes. This results in depletion of follicles in early adulthood, causing premature ovarian failure (POF). Our results suggest that the *Tsc1*–*Tsc2* complex mediated suppression of mTORC1 activity is indispensable for maintenance of the dormancy of primordial follicles, thus preserving the follicular pool, and that mTORC1 activity in oocytes promotes follicular activation. Our results also indicate that deregulation of *Tsc*/mTOR signaling in oocytes may cause pathological conditions of the ovary such as infertility and POF.

**Key words:** follicular activation / oocytes / *Tsc*/mTOR signaling / premature ovarian failure

## Introduction

To maintain the lengthy female reproductive life, the majority of primordial follicles must be preserved in a quiescent state for later use (Hirshfield, 1991; McGee and Hsueh, 2000). In order to produce mature ova, primordial follicles are recruited from the reservoir of dormant follicles into the growing follicular pool, through a process termed follicular activation (McGee and Hsueh, 2000). The activation of primordial follicles is a highly regulated process, and its underlying mechanisms are not fully revealed (Liu *et al.*, 2006, 2007; Adhikari and Liu, 2009; Reddy *et al.*, 2009). Menopause, or ovarian senescence occurs when the pool of primordial follicles has become exhausted (Faddy *et al.*, 1992; Broekmans *et al.*, 2007; Hansen *et al.*, 2008).

Our earlier studies revealed that PTEN (phosphatase and tensin homolog deleted on chromosome 10), a negative regulator of phosphatidylinositol 3 kinase (PI3K), functions in oocytes as a suppressor of follicular activation (Reddy *et al.*, 2008). Inhibition with rapamycin, the

specific inhibitor of the mammalian serine/threonine kinase mammalian target of rapamycin (mTOR), indicated a role for mTOR as well as PI3K in follicle activation (Reddy *et al.*, 2008). Signaling events through mTOR, which regulate cell growth and proliferation in many types of cells, are closely related to the PI3K signaling pathway (Wullschlegel *et al.*, 2006; Guertin and Sabatini, 2007). mTOR modulates important processes such as protein synthesis, ribosome biogenesis and autophagy (Sarbasov *et al.*, 2005; Wullschlegel *et al.*, 2006; Guertin and Sabatini, 2007). In human cells, mTOR complex 1 (mTORC1) activity is negatively regulated by a heterodimeric complex consisting of two protein molecules: tuberous sclerosis complex 1 (TSC1, or hamartin) and tuberous sclerosis complex 2 (TSC2, or tuberin). TSC1 and TSC2 are products of two distinct tumor suppressor genes: *TSC1* and *TSC2*, respectively. These two genes are the genetic loci that are mutated in the autosomal dominant tumor syndrome tuberous sclerosis complex (TSC), which is characterized by numerous benign tumors (Kwiatkowski *et al.*, 2002; Crino *et al.*, 2006; Yang and Guan, 2007).

<sup>†</sup>These authors equally contributed to this article.

The TSC1–TSC2 complex suppresses the activation of mTORC1 through a GTPase activating protein domain located in TSC2. The function of TSC1 is to stabilize TSC2 and protect it from ubiquitination and degradation (Chong-Kopera et al., 2006).

To determine whether the Tsc/mTORC1 signaling in oocytes takes part in the regulation of follicular activation, in this study, we deleted the *Tsc2* gene from mouse oocytes in primordial and developing follicles. Deletion of *Tsc2* caused premature activation of all primordial follicles around the time of puberty, due to elevated mTORC1 activity in oocytes. This eventually led to follicular depletion in early adulthood, causing premature ovarian failure (POF). Thus, the Tsc1–Tsc2 complex mediated suppression of mTORC1 activity in oocytes is indispensable for sustaining the dormancy of primordial follicles, which is essential for preserving the female reproductive lifespan.

## Materials and Methods

### Mice

*Tsc2<sup>loxP/loxP</sup>* mice (Hernandez et al., 2007) with a mixed 129S4/SvJae and C57BL/6J genomic background were crossed with transgenic mice carrying growth differentiation factor 9 (*Gdf9*) promoter-mediated Cre recombinase that had a C57BL/6J background (Lan et al., 2004; Reddy et al., 2008). After multiple rounds of crossing, we obtained homozygous mutant female mice lacking *Tsc2* in oocytes (referred to as *OoTsc2<sup>-/-</sup>* mice). Control mice that do not carry the Cre transgene are referred to as *OoTsc2<sup>+/+</sup>* mice. All comparisons were made between littermates. The mice were housed under controlled environmental conditions with free access to water and food. Illumination was on between 0600 and 1800 h. Experimental protocols were approved by the regional ethical committee of Umeå University, Sweden.

### Reagents, antibodies and immunological detection methods

Rabbit polyclonal antibodies to phospho-rpS6 (S240/4), Tsc2/tuberin and phospho-S6K1 (T389), and also rabbit monoclonal antibody to S6K1 were obtained from Cell Signaling Technologies (Beverly, MA, USA). Mouse monoclonal antibody to rpS6 was purchased from Santa Cruz Biotechnology Inc. (Santa Cruz, CA, USA). Mouse monoclonal antibody to  $\beta$ -actin was purchased from Sigma-Aldrich Sweden AB (Stockholm, Sweden). Western blots were carried out according to the instructions of the suppliers of the different antibodies and visualized using the ECL Plus Western Blotting Detection System (Amersham Biosciences, Uppsala, Sweden).

### Histological analysis of ovarian tissues

Histological analysis of ovary was performed as previously described (Reddy et al., 2008). Briefly, ovaries were fixed in 4% paraformaldehyde, dehydrated and embedded in paraffin. Paraffin-embedded ovaries were serially sectioned at 8- $\mu$ m thickness and stained with hematoxylin for morphological observation, and all sections from each ovarian block were examined. One or both ovaries from more than three mice of each genotype were used for each time point.

### Isolation of oocytes from post-natal mouse ovaries

Mice were sacrificed by decapitation, and the ovaries were dissected free of fat and connective tissue using a dissection microscope. The ovaries were then minced with a pair of dissection scissors before being incubated

in 0.05% collagenase dissolved in Dulbecco's modified Eagle's medium-F12 (DMEM/F12; Invitrogen) supplemented with 4 mg/ml bovine serum albumin (BSA), 100 units/ml penicillin and 100  $\mu$ g/ml streptomycin, with frequent agitation and pipetting. After the tissues had mostly been digested by collagenase, usually within 45–60 min, EDTA was added to this mixture to a final concentration of 40 mM, and the mixture was incubated at 37°C with frequent pipetting for another 15–20 min until clusters of granulosa cells or other cells were completely dispersed. The mixture of cells and oocytes was then washed once and cultured in a 6 or 10-cm tissue culture dish with the above-mentioned serum-free DMEM/F12 medium for 12 h, to allow the granulosa cells and other ovarian cells to attach to the plastic. The unattached oocytes and red blood cells were then recovered by collection of the supernatant and centrifugation at 160 g for 5 min at room temperature. Red blood cells were subsequently removed using a hypotonic buffer containing 144 mM  $\text{NH}_4\text{Cl}$  and 17 mM Tris–HCl (pH 7.2). After several washes, oocytes were collected by centrifugation. They were then lysed in a buffer containing 50 mM Tris–HCl (pH 8.0), 120 mM NaCl, 20 mM NaF, 20 mM  $\beta$ -glycerophosphate, 1 mM EDTA, 6 mM EGTA (pH 8.0), 1% NP-40, 1 mM DTT, 5 mM benzamide, 1 mM PMSF, 250  $\mu$ M sodium orthovanadate, 10  $\mu$ g/ml aprotinin, 10  $\mu$ g/ml leupeptin and 1  $\mu$ g/ml pepstatin, followed by centrifugation at 14 576 g for 20 min at 4°C. The supernatants were collected and protein concentrations were measured using the bicinchoninic acid (BCA) protein assay, and equal amounts of proteins were used for western blot.

## Results

### Generation of mutant mice with oocyte-specific deletion of *Tsc2*

We generated mutant mice in which the *Tsc2* gene was deleted in oocytes of primordial and developing follicles (*OoTsc2<sup>-/-</sup>* mice) by crossing *Tsc2<sup>loxP/loxP</sup>* mice (Hernandez et al., 2007) with transgenic mice expressing *Gdf9* promoter-mediated Cre recombinase (Lan et al., 2004). Western blot result showed that the expression of the Tsc2 protein (tuberin) was completely absent in *OoTsc2<sup>-/-</sup>* oocytes (Fig. 1), indicating a successful deletion of the *Tsc2* gene from oocytes.

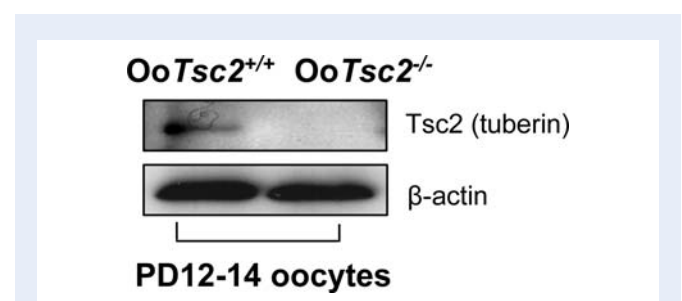

**Figure 1** Oocyte-specific deletion of *Tsc2* in mice. Western blots showing the absence of Tsc2 (tuberin) protein expression in oocytes of *OoTsc2<sup>-/-</sup>* mice. Oocytes were isolated from ovaries of 12–14-day-old *OoTsc2<sup>+/+</sup>* and *OoTsc2<sup>-/-</sup>* mice as described in Materials and Methods. For each experiment, material from three to five mice was used per lane. For each lane, around 20  $\mu$ g of protein was loaded. Level of  $\beta$ -actin was used as an internal control. The experiments were repeated three times and representative images are shown.

## Shortened reproductive lifespan of *OoTsc2*<sup>-/-</sup> female mice

We found that the *OoTsc2*<sup>-/-</sup> females had a normal vaginal opening at the age of 5–6 weeks (which is the appropriate age). However, during the examined period from 7 to 27 weeks of age, *OoTsc2*<sup>-/-</sup> females were found to produce at most 2 litters of normal size, then they became infertile in young adulthood (i.e. after 12–13 weeks of age) (Fig. 2).

## Enhanced mTORC1 activity in *OoTsc2*<sup>-/-</sup> oocytes

We found that loss of *Tsc2* led to enhanced mTORC1 activity in *OoTsc2*<sup>-/-</sup> oocytes, as indicated by the elevated phosphorylation of mTORC1 substrate S6K1 (p70 S6 kinase 1) (Fig. 3, p-S6K1, T389). Such elevated p-S6K1 had apparently led to an increase in activity, as the phosphorylation of the substrate of S6K1, rpS6 (ribosomal protein S6), was dramatically elevated in *OoTsc2*<sup>-/-</sup> oocytes (Fig. 3, p-rpS6, S240/4). These data showed that the mTORC1–S6K1–rpS6 signaling were elevated in *OoTsc2*<sup>-/-</sup> oocytes.

## Accelerated activation of the entire pool of primordial follicles followed by premature follicular depletion in *OoTsc2*<sup>-/-</sup> mice

To learn how the elevated mTORC1–S6K1–rpS6 signaling in oocytes may lead to shortened reproductive lifespan in *OoTsc2*<sup>-/-</sup> mice, we compared the post-natal follicular development in *OoTsc2*<sup>-/-</sup> mice to that in *OoTsc2*<sup>+/+</sup> mice. We found that the pool of primordial follicles was formed normally in *OoTsc2*<sup>-/-</sup> mice, and no apparent morphological difference was observed in post-natal day (PD) 13 ovaries of *OoTsc2*<sup>-/-</sup> (Fig. 4B) and *OoTsc2*<sup>+/+</sup> (Fig. 4A) mice, where ovaries of both mutant and control mice had clusters of primordial follicles (Fig. 4A and B, inset, arrows). At PD23, the *OoTsc2*<sup>-/-</sup> ovaries (Fig. 4D) appeared somewhat larger than the *OoTsc2*<sup>+/+</sup> ovaries (Fig. 4C). By this age, all primordial follicles had been activated with enlarged oocytes in *OoTsc2*<sup>-/-</sup> ovaries (Fig. 4D, inset, red arrows). However, in *OoTsc2*<sup>+/+</sup> ovaries, cluster of primordial follicles were seen (Fig. 4C, inset, arrows). At PD35, *OoTsc2*<sup>-/-</sup> ovaries appeared larger, and contained many activated follicles with enlarged oocytes (Fig. 4F, inset, red arrows), whereas the control *OoTsc2*<sup>+/+</sup> ovaries were much smaller (Fig. 4E) and contained clusters of primordial follicles (Fig. 4E, inset, arrows). All types of activated follicles, including transient follicles (containing enlarged oocyte surrounded by flattened pregranulosa cells), type 3b, type 4, type 5 and type 6 follicles were seen in *OoTsc2*<sup>-/-</sup> ovaries. Thus, with *Tsc2* deleted in oocytes, the entire pool of primordial follicles was activated by PD23.

By 4 months of age, no healthy follicular structure could be identified in *OoTsc2*<sup>-/-</sup> ovaries (Fig. 4H), and only unhealthy dying oocytes were observed (Fig. 4H, inset, arrows). In contrast, the control *OoTsc2*<sup>+/+</sup> mice contained healthy follicles and corpus luteum (CL) (Fig. 4G). Thus, premature activation of the primordial follicle pool led to follicle depletion and POF in *OoTsc2*<sup>-/-</sup> mice in early adulthood.

## Discussion

In this study, by using a mouse model with oocyte-specific deletion of the *Tsc2* gene, we showed that the tumor suppressor *Tsc2* plays an

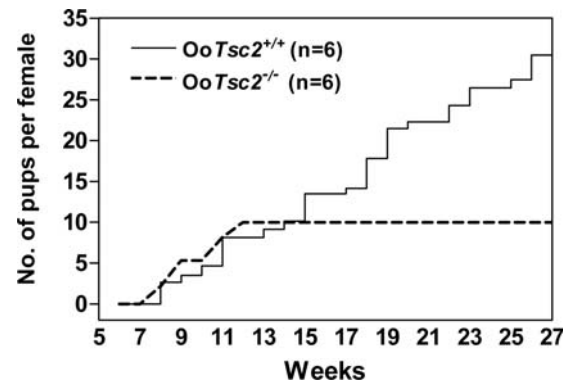

**Figure 2** Subfertility in mice lacking *Tsc2* in oocytes. Comparison of the cumulative number of pups per *OoTsc2*<sup>-/-</sup> female ( $n=6$ , dashed line) and per *OoTsc2*<sup>+/+</sup> female ( $n=6$ , solid line). All *OoTsc2*<sup>-/-</sup> females became infertile in young adulthood after Week 12–13.

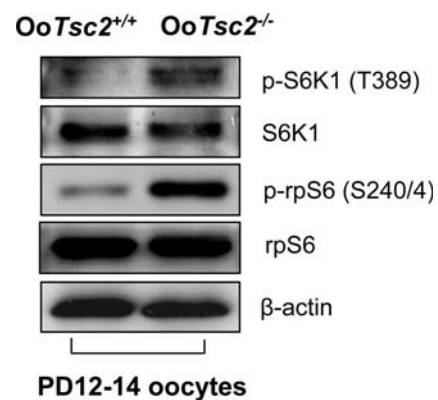

**Figure 3** Studies of mTORC1 signaling in *OoTsc2*<sup>-/-</sup> and *OoTsc2*<sup>+/+</sup> oocytes. Comparison of *Tsc2*/mTORC1 signaling in *OoTsc2*<sup>-/-</sup> and *OoTsc2*<sup>+/+</sup> oocytes. Oocytes were isolated from ovaries of mice at PD12–14 and western blot was performed as described in Materials and Methods. mTORC1 signaling in *OoTsc2*<sup>-/-</sup> oocytes was enhanced, as indicated by elevated levels of phosphorylated S6K1 (p-S6K1, T389) and phosphorylated rpS6 (p-rpS6, S240/4). Levels of total S6K1, rpS6 and  $\beta$ -actin were used as internal controls. The experiments were repeated three times. For each experiment, material from three to five mice was used per lane. Representative images are shown.

essential physiological role in oocytes to preserve the female reproductive lifespan by suppressing activation of primordial follicles. We demonstrated that deletion of *Tsc2* in oocytes leads to premature activation of the entire pool of primordial follicles. We also showed that the driving force underlying the overactivation of primordial follicles in *OoTsc2*<sup>-/-</sup> mice is the elevated *intra-oocyte* mTORC1–S6K1–rpS6 signaling. We observed all types of activated follicles, including transient, types 3b, 4, 5 and 6 follicles in *OoTsc2*<sup>-/-</sup> ovaries. However, even though more primordial follicles were prematurely recruited

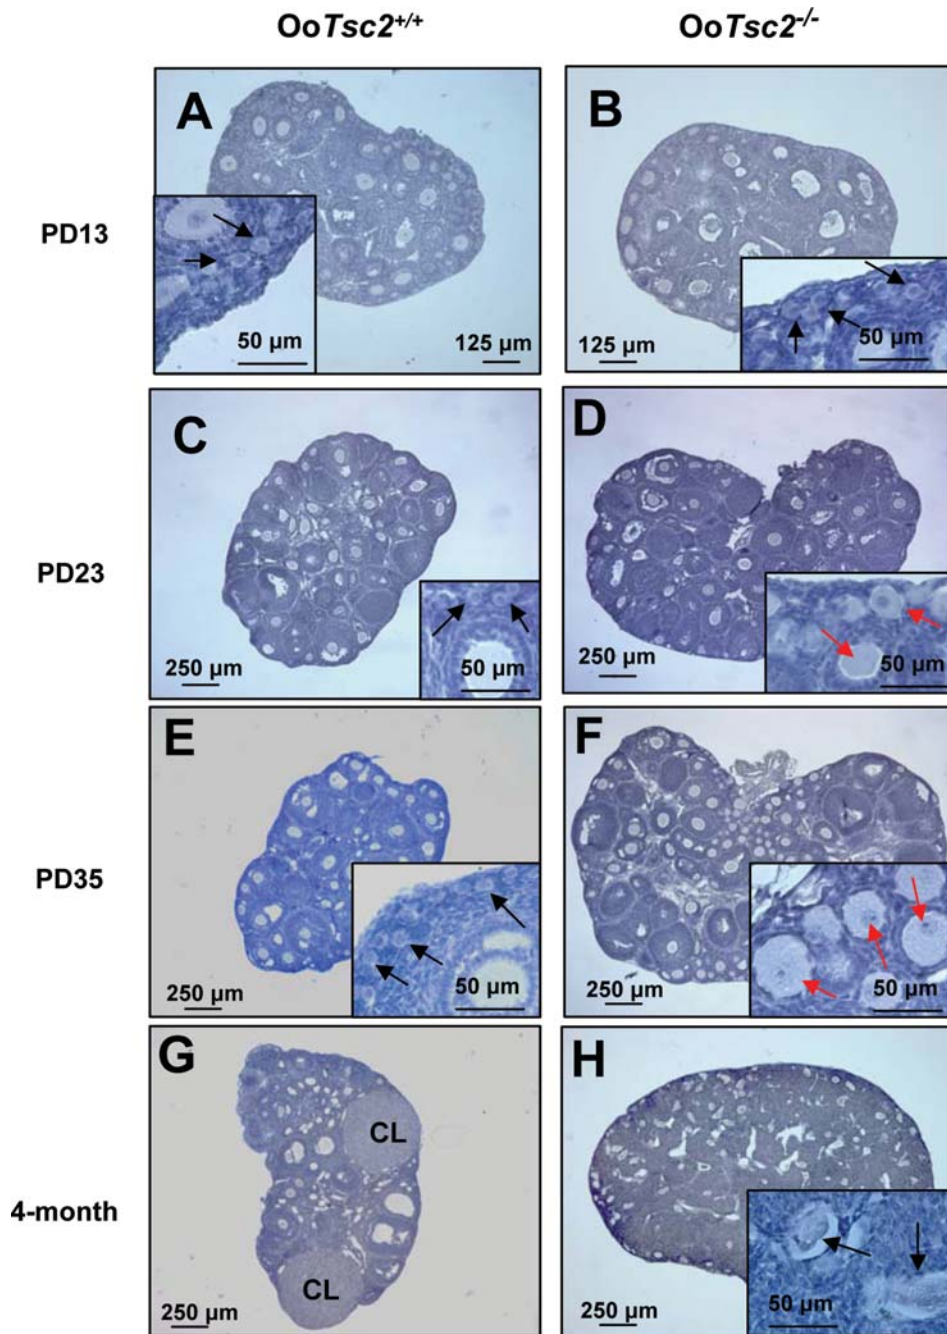

**Figure 4** Activation of the entire pool of primordial follicles leading to follicle depletion and POF at young adulthood in *OoTsc2*<sup>-/-</sup> mice. (**A–F**) Morphological analysis of ovaries from *OoTsc2*<sup>-/-</sup> and *OoTsc2*<sup>+/+</sup> littermates at PD13, PD23 and PD35. Ovaries from 13-, 23- and 35-day-old *OoTsc2*<sup>+/+</sup> and *OoTsc2*<sup>-/-</sup> mice were embedded in paraffin, and serial sections of 8-μm thickness were prepared and stained with hematoxylin. At PD13, similar ovarian morphologies were seen in sections from *OoTsc2*<sup>+/+</sup> (**A**) and *OoTsc2*<sup>-/-</sup> (**B**) ovaries. Cluster of primordial follicles were seen in both *OoTsc2*<sup>+/+</sup> (**A**, inset, arrows) and *OoTsc2*<sup>-/-</sup> (**B**, inset, arrows) ovaries at PD13. At PD23, *OoTsc2*<sup>-/-</sup> ovaries were larger (**D**) than *OoTsc2*<sup>+/+</sup> ovaries (**C**). No primordial follicles could be seen by PD23 in *OoTsc2*<sup>-/-</sup> ovaries, and almost all the primordial follicles were activated with apparently enlarged oocytes surrounded by flattened granulosa cells (**D**, inset, red arrows). In *OoTsc2*<sup>+/+</sup> ovaries primordial follicles could be readily observed at PD23 (**C**, inset, arrows). At PD35, *OoTsc2*<sup>-/-</sup> ovaries were much larger (**F**), with all the follicles activated (**F**, inset, red arrows) than *OoTsc2*<sup>+/+</sup> ovaries (**E**), which still had cluster of primordial follicles (**E**, inset, arrows). (**G–H**) Morphological analysis of ovaries from *OoTsc2*<sup>-/-</sup> and *OoTsc2*<sup>+/+</sup> littermates at 4 months of age. At 4 months of age, almost all follicles had degenerated and healthy follicular structures had completely disappeared in *OoTsc2*<sup>-/-</sup> ovaries (**H**). Two degenerating oocytes were shown (**H**, inset, arrows). As a control, *OoTsc2*<sup>+/+</sup> mice had normal ovarian morphology (**G**). CL was seen showing that *OoTsc2*<sup>+/+</sup> mice had been ovulating (**G**). The experiments were repeated at least four times, and for each time and each age, ovaries from one mouse of each genotype were used. CL, corpus luteum.



into the growing follicular pool in *OoTsc2*<sup>-/-</sup> mice, the litter sizes of *OoTsc2*<sup>-/-</sup> mice do not seem to be apparently different from those of *OoTsc2*<sup>+/+</sup> mice.

In our parallel study with a mouse model carrying oocyte-specific deletion of *Tsc1* (referred to as *OoTsc1*<sup>-/-</sup> mice), we found a similar phenotype in that the entire pool of primordial follicles was prematurely activated in young adulthood (Adhikari et al., 2009). These studies indicate that the tumor suppressors *Tsc1* and *Tsc2* do play physiological roles in oocytes of primordial follicles to suppress their activation. On the basis of the current study and our parallel study with the *Tsc1* in mice (Adhikari et al., 2009), we confirm that the *Tsc1*–*Tsc2* complex mediated suppression of mTORC1 activity in oocytes is indispensable for maintenance of the dormancy of primordial follicles, thus preserving the follicular pool.

Nevertheless, one major unsolved question is that how the expressions and functions of *Tsc1* and *Tsc2* in oocytes are regulated, in order to orchestrate follicular activation throughout the female reproductive life.

It was hypothesized more than a decade ago that dormant primordial follicles may be under constant inhibitory influences of local origin to remain quiescent (Wandji et al., 1996). Our earlier reports have shown that PTEN in oocytes functions as a suppressor of follicular activation (Reddy et al., 2008). It is clear now that *Tsc2* and *Tsc1* (Adhikari et al., 2009) in oocytes are also parts of the inhibitory mechanisms. Other recognized inhibitory molecules include the cyclin-dependent kinase (Cdk) inhibitor p27<sup>kip1</sup> (p27, or Cdkn1b) (Rajareddy et al., 2007), which functions in both oocytes and pregranulosa cells to suppress follicular activation; and Foxo3a, which is a downstream transcription factor of the PTEN/PI3K pathway that functions in oocytes to suppress follicular activation (Castrillon et al., 2003; Reddy et al., 2008).

In women, reproductive lifespan and menopausal age are determined by their ovarian reserve, i.e. the size and persistence of the primordial follicle pool. Our results from the current study and several recent reports using genetically modified mouse models imply that deregulation of signaling events in oocytes, such as the *Tsc1*–*Tsc2*/mTORC1 signaling (Adhikari et al., 2009), the PTEN/PI3K signaling (Reddy et al., 2008, 2009) and the p27-Cdk system (Rajareddy et al., 2007), may contribute to defects in primordial follicle development in humans, which may result in pathological conditions of the ovary, such as POF and infertility. The possible involvement of the above-mentioned molecules in human POF, however, needs to be investigated. In this sense, our work may have both physiological and clinical implications.

## Acknowledgements

We thank Dr Austin Cooney (Baylor College of Medicine, TX, USA) for kindly providing the *Gdf9*-Cre mice.

## Funding

This work was supported by grants from the Swedish Research Council (K.L.), the Swedish Cancer Foundation (K.L.), the Young Researcher Award of Umeå University, Sweden (K.L.), the Lions Cancer Research Foundation in Norrland, Sweden (K.L.), and the Novo Nordisk Foundation, Denmark (K.L.), and the Cutting-Edge

Research Grant from the County Council of Västerbotten, Sweden (E.L.).

## References

- Adhikari D, Liu K. Molecular mechanisms underlying the activation of mammalian primordial follicles. *Endocr Rev* 2009;**30**:438–464.
- Adhikari D, Zheng W, Shen Y, Gorre N, Hämläinen T, Cooney AJ, Huhtaniemi I, Lan ZJ, Liu K. Tsc/mTORC1 signaling in oocytes governs the quiescence and activation of primordial follicles. *Hum Mol Genet* 2009 (in press).
- Broekmans FJ, Knauff EA, te Velde ER, Macklon NS, Fauser BC. Female reproductive ageing: current knowledge and future trends. *Trends Endocrinol Metab* 2007;**18**:58–65.
- Castrillon DH, Miao L, Kollipara R, Horner JW, DePinho RA. Suppression of ovarian follicle activation in mice by the transcription factor Foxo3a. *Science* 2003;**301**:215–218.
- Chong-Kopera H, Inoki K, Li Y, Zhu T, Garcia-Gonzalo FR, Rosa JL, Guan KL. TSC1 stabilizes TSC2 by inhibiting the interaction between TSC2 and the HERC1 ubiquitin ligase. *J Biol Chem* 2006;**281**:8313–8316.
- Crino PB, Nathanson KL, Henske EP. The tuberous sclerosis complex. *N Engl J Med* 2006;**355**:1345–1356.
- Faddy MJ, Gosden RG, Gougeon A, Richardson SJ, Nelson JF. Accelerated disappearance of ovarian follicles in mid-life: implications for forecasting menopause. *Hum Reprod* 1992;**7**:1342–1346.
- Guertin DA, Sabatini DM. Defining the role of mTOR in cancer. *Cancer Cell* 2007;**12**:9–22.
- Hansen KR, Knowlton NS, Thyer AC, Charleston JS, Soules MR, Klein NA. A new model of reproductive aging: the decline in ovarian non-growing follicle number from birth to menopause. *Hum Reprod* 2008;**23**:699–708.
- Hernandez O, Way S, McKenna J III, Gambello MJ. Generation of a conditional disruption of the *Tsc2* gene. *Genesis* 2007;**45**:101–106.
- Hirshfield AN. Development of follicles in the mammalian ovary. *Int Rev Cytol* 1991;**124**:43–101.
- Kwiatkowski DJ, Zhang H, Bandura JL, Heiberger KM, Glogauer M, el Hashemite N, Onda H. A mouse model of TSC1 reveals sex-dependent lethality from liver hemangiomas, and up-regulation of p70S6 kinase activity in *Tsc1* null cells. *Hum Mol Genet* 2002;**11**:525–534.
- Lan ZJ, Xu X, Cooney AJ. Differential oocyte-specific expression of Cre recombinase activity in *GDF9-iCre*, *Zp3cre*, and *Msx2Cre* transgenic mice. *Biol Reprod* 2004;**71**:1469–1474.
- Liu K, Rajareddy S, Liu L, Jagarlamudi K, Boman K, Selstam G, Reddy P. Control of mammalian oocyte growth and early follicular development by the oocyte PI3 kinase pathway: new roles for an old timer. *Dev Biol* 2006;**299**:1–11.
- Liu L, Rajareddy S, Reddy P, Du C, Jagarlamudi K, Shen Y, Gunnarsson D, Selstam G, Boman K, Liu K. Infertility caused by retardation of follicular development in mice with oocyte-specific expression of Foxo3a. *Development* 2007;**134**:199–209.
- McGee EA, Hsueh AJ. Initial and cyclic recruitment of ovarian follicles. *Endocr Rev* 2000;**21**:200–214.
- Rajareddy S, Reddy P, Du C, Liu L, Jagarlamudi K, Tang W, Shen Y, Berthet C, Peng SL, Kaldis P et al. p27kip1 (cyclin-dependent kinase inhibitor 1B) controls ovarian development by suppressing follicle endowment and activation and promoting follicle atresia in mice. *Mol Endocrinol* 2007;**21**:2189–2202.

- Reddy P, Zheng W, Liu K. Mechanisms maintaining the dormancy and survival of mammalian primordial follicles. *Trends Endocrinol Metab* 2009 (in press).
- Reddy P, Liu L, Adhikari D, Jagarlamudi K, Rajareddy S, Shen Y, Du C, Tang W, Hamalainen T, Peng SL et al. Oocyte-specific deletion of Pten causes premature activation of the primordial follicle pool. *Science* 2008;**319**:611–613.
- Reddy P, Adhikari D, Zheng W, Liang S, Hamalainen T, Tohonen V, Ogawa W, Noda T, Volarevic S, Huhtaniemi I et al. PDK1 signaling in oocytes controls reproductive aging and lifespan by manipulating the survival of primordial follicles. *Hum Mol Genet* 2009;**18**:2813–2824.
- Sarbassov DD, Guertin DA, Ali SM, Sabatini DM. Phosphorylation and regulation of Akt/PKB by the rictor-mTOR complex. *Science* 2005;**307**:1098–1101.
- Wandji SA, Srsen V, Voss AK, Eppig JJ, Fortune JE. Initiation in vitro of growth of bovine primordial follicles. *Biol Reprod* 1996;**55**:942–948.
- Wullschlegel S, Loewith R, Hall MN. TOR signaling in growth and metabolism. *Cell* 2006;**124**:471–484.
- Yang Q, Guan KL. Expanding mTOR signaling. *Cell Res* 2007;**17**:666–681.
- Submitted on October 9, 2009; resubmitted on October 16, 2009; accepted on October 17, 2009
